# Supplementary material for: Configurational Molecular Glue: One Optically Active Polymer Attracts Two Oppositely Configured Optically Active Polymers
Source: PubMed Central journal article supplement (PMC5364539; doi:10.1038/srep45170), 2017-03-24
Supplement: srep45170-s1.pdf [file srep45170-s1.pdf]

Supplementary Information for:  
Configurational Molecular Glue:  
One Optically Active Polymer Attracts Two Oppositely Configured  
Optically Active Polymers

*Hideto Tsuji,\* Soma Noda, Takayuki Kimura, Tadashi Sobue, and Yuki Arakawa*

*Department of Environmental and Life Sciences,  
Graduate School of Engineering,  
Toyohashi University of Technology,  
Tempaku-cho, Toyohashi, Aichi 441-8580, Japan  
E-mail: [tsuji@ens.tut.ac.jp](mailto:tsuji@ens.tut.ac.jp)*

**Contents:**

**S1. Crystallinity values of blends (Table S1)**

**S2. Thermal properties of blends (Table S2)**

## S1. Crystallinity values of blends

**Table S1.** Crystallinity values of blends.

| Crystallization method | D-PLA/L-P2HB/D-P2H3MB (mol/mol/mol) | Type of SC        | $X_c(\text{SC})$ (%) | $X_c(\text{D-PLA})$ (%) | $X_c(\text{L-P2HB})$ (%) | $X_c(\text{D-P2H3MB})$ (%) | $X_c(\text{tot})^{\text{a)}}$ (%) |
|------------------------|-------------------------------------|-------------------|----------------------|-------------------------|--------------------------|----------------------------|-----------------------------------|
| precipitation          | 0/50/50                             | HTSC              | 61.1                 | -                       | 1.6                      | 8.1                        | 70.8                              |
|                        | 50/50/0                             | HTSC              | 52.0                 | 3.8                     | 2.2                      | -                          | 58.0                              |
|                        | 50/0/50                             |                   | -                    | 28.0                    | -                        | 38.8                       | 66.8                              |
|                        | 45/10/45                            | TSC <sup>b)</sup> | 15.0                 | 14.4                    | -                        | 33.3                       | 62.7                              |
|                        | 40/20/40                            | TSC <sup>b)</sup> | 29.6                 | 8.6                     | -                        | 22.6                       | 60.8                              |
|                        | 35/30/35                            | TSC <sup>b)</sup> | 33.6                 | 2.3                     | -                        | 18.5                       | 54.4                              |
|                        | 30/40/30                            | TSC <sup>b)</sup> | 50.1                 | 1.5                     | 2.3                      | 7.0                        | 60.9                              |
|                        | 25/50/25                            | TSC <sup>b)</sup> | 49.3                 | -                       | 10.2                     | 3.4                        | 62.9                              |
| Solvent evaporation    | 0/50/50                             | HTSC              | 70.5                 | -                       | -                        | 7.3                        | 77.8                              |
|                        | 50/50/0                             | HTSC              | 23.6                 | 19.2                    | 5.3                      | -                          | 48.1                              |
|                        | 50/0/50                             |                   | -                    | 21.1                    | -                        | 31.4                       | 52.5                              |
|                        | 45/10/45                            | TSC <sup>b)</sup> | 4.3                  | 20.0                    | -                        | 25.7                       | 50.0                              |
|                        | 40/20/40                            | TSC <sup>b)</sup> | 30.8                 | 9.6                     | -                        | 20.4                       | 60.8                              |
|                        | 35/30/35                            | TSC <sup>b)</sup> | 50.0                 | 5.0                     | -                        | 11.2                       | 66.2                              |
|                        | 30/40/30                            | TSC <sup>b)</sup> | 58.0                 | 6.0                     | -                        | 2.8                        | 66.8                              |
|                        | 25/50/25                            | TSC <sup>b)</sup> | 64.6                 | 3.5                     | 1.3                      | -                          | 69.4                              |

<sup>a)</sup>  $X_c(\text{tot}) = X_c(\text{SC}) + X_c(\text{D-PLA}) + X_c(\text{L-P2HB}) + X_c(\text{D-P2H3MB})$ .

<sup>b)</sup> Ternary stereocomplex.

## S2. Thermal properties of blends

**Table S2.** Thermal properties of blends.

| Crystallization method | D-PLA/L-P2HB/D-P2H3MB (mol/mol/mol) | $T_g^{\text{a)}}$ (°C) | $T_{cc}^{\text{a)}}$ (°C) | $T_m^{\text{a)}}$ (°C)     | $\Delta H_{cc}^{\text{b)}}$ (J g <sup>-1</sup> ) | $\Delta H_m^{\text{b)}}$ (J g <sup>-1</sup> ) | $\Delta H(\text{tot})^{\text{b)}}$ (J g <sup>-1</sup> ) |
|------------------------|-------------------------------------|------------------------|---------------------------|----------------------------|--------------------------------------------------|-----------------------------------------------|---------------------------------------------------------|
| precipitation          | 0/50/50                             | 32.8                   | -                         | 104.2, 186.2, 206.1        | -                                                | 41.9                                          | 41.9                                                    |
|                        | 50/50/0                             | 54.7                   | 105.5                     | 95.1, 168.2 <sup>c)</sup>  | -1.8                                             | 47.4                                          | 45.6                                                    |
|                        | 50/0/50                             | 27.3, 48.3             | 103.8, 133.6              | 160.7, 179.0, 188.6        | -7.7                                             | 39.0                                          | 31.3                                                    |
|                        | 45/10/45                            | 40.1, 51.6             | 103.9                     | 160.3, 186.8, 200.7        | -3.4                                             | 41.3                                          | 37.9                                                    |
|                        | 40/20/40                            | 44.8                   | 103.9                     | 160.9, 187.9, 200.5        | -3.6                                             | 42.7                                          | 39.1                                                    |
|                        | 35/30/35                            | 42.7                   | 104.1                     | 92.9, 163.0, 200.9         | -3.7                                             | 41.9                                          | 38.2                                                    |
|                        | 30/40/30                            | 50.7                   | 106.5                     | 163.7, 204.1               | -1.3                                             | 43.8                                          | 42.5                                                    |
|                        | 25/50/25                            | 33.1, 51.1             | -                         | 103.0, 111.5, 163.5, 204.4 | -                                                | 38.2                                          | 38.2                                                    |
| Solvent evaporation    | 0/50/50                             | 42.6                   |                           | 162.8, 171.6, 210.8        | -                                                | -                                             | 45.5                                                    |
|                        | 50/50/0                             | 25.3                   | 73.8                      | 101.9, 162.7, 168.4        | -7.8                                             | 43.1                                          | 35.3                                                    |
|                        | 50/0/50                             | 52.8                   | 79.6                      | 162.1, 175.6               | -1.6                                             | 43.5                                          | 41.9                                                    |
|                        | 45/10/45                            | 49.0                   | 79.0                      | 159.5, 163.0, 175.5, 201.9 | -0.2                                             | 51.8                                          | 51.6                                                    |
|                        | 40/20/40                            | 49.5                   | 80.8                      | 160.7, 163.3, 203.9        | -0.1                                             | 46.9                                          | 46.8                                                    |
|                        | 35/30/35                            | 46.4                   | 81.8                      | 161.4, 206.4               | -0.2                                             | 49.0                                          | 48.8                                                    |
|                        | 30/40/30                            | 50.0                   | 80.7                      | 161.0, 208.8               | -0.5                                             | 50.5                                          | 50.0                                                    |
|                        | 25/50/25                            | 42.5                   | 82.6                      | 163.0, 209.6               | -0.9                                             | 47.1                                          | 46.2                                                    |

<sup>a)</sup>  $T_g$ ,  $T_{cc}$ , and  $T_m$  are glass transition, cold crystallization, and melting temperatures, respectively.

<sup>b)</sup>  $\Delta H_{cc}$  and  $\Delta H_m$  are cold crystallization and melting enthalpies, respectively.  $\Delta H(\text{tot}) = \Delta H_{cc} + \Delta H_m$ .

<sup>c)</sup> Melting peak of D-PLA homo-crystallites was included in that of D-PLA/L-P2HB HTSC crystallites.
